Published by

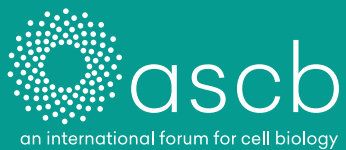

Volume 15, Summer 2016

Editorial Partner

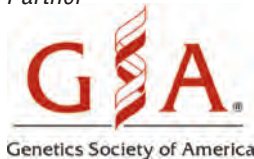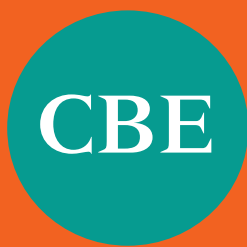

# Life Sciences Education

[www.lifescied.org](http://www.lifescied.org)

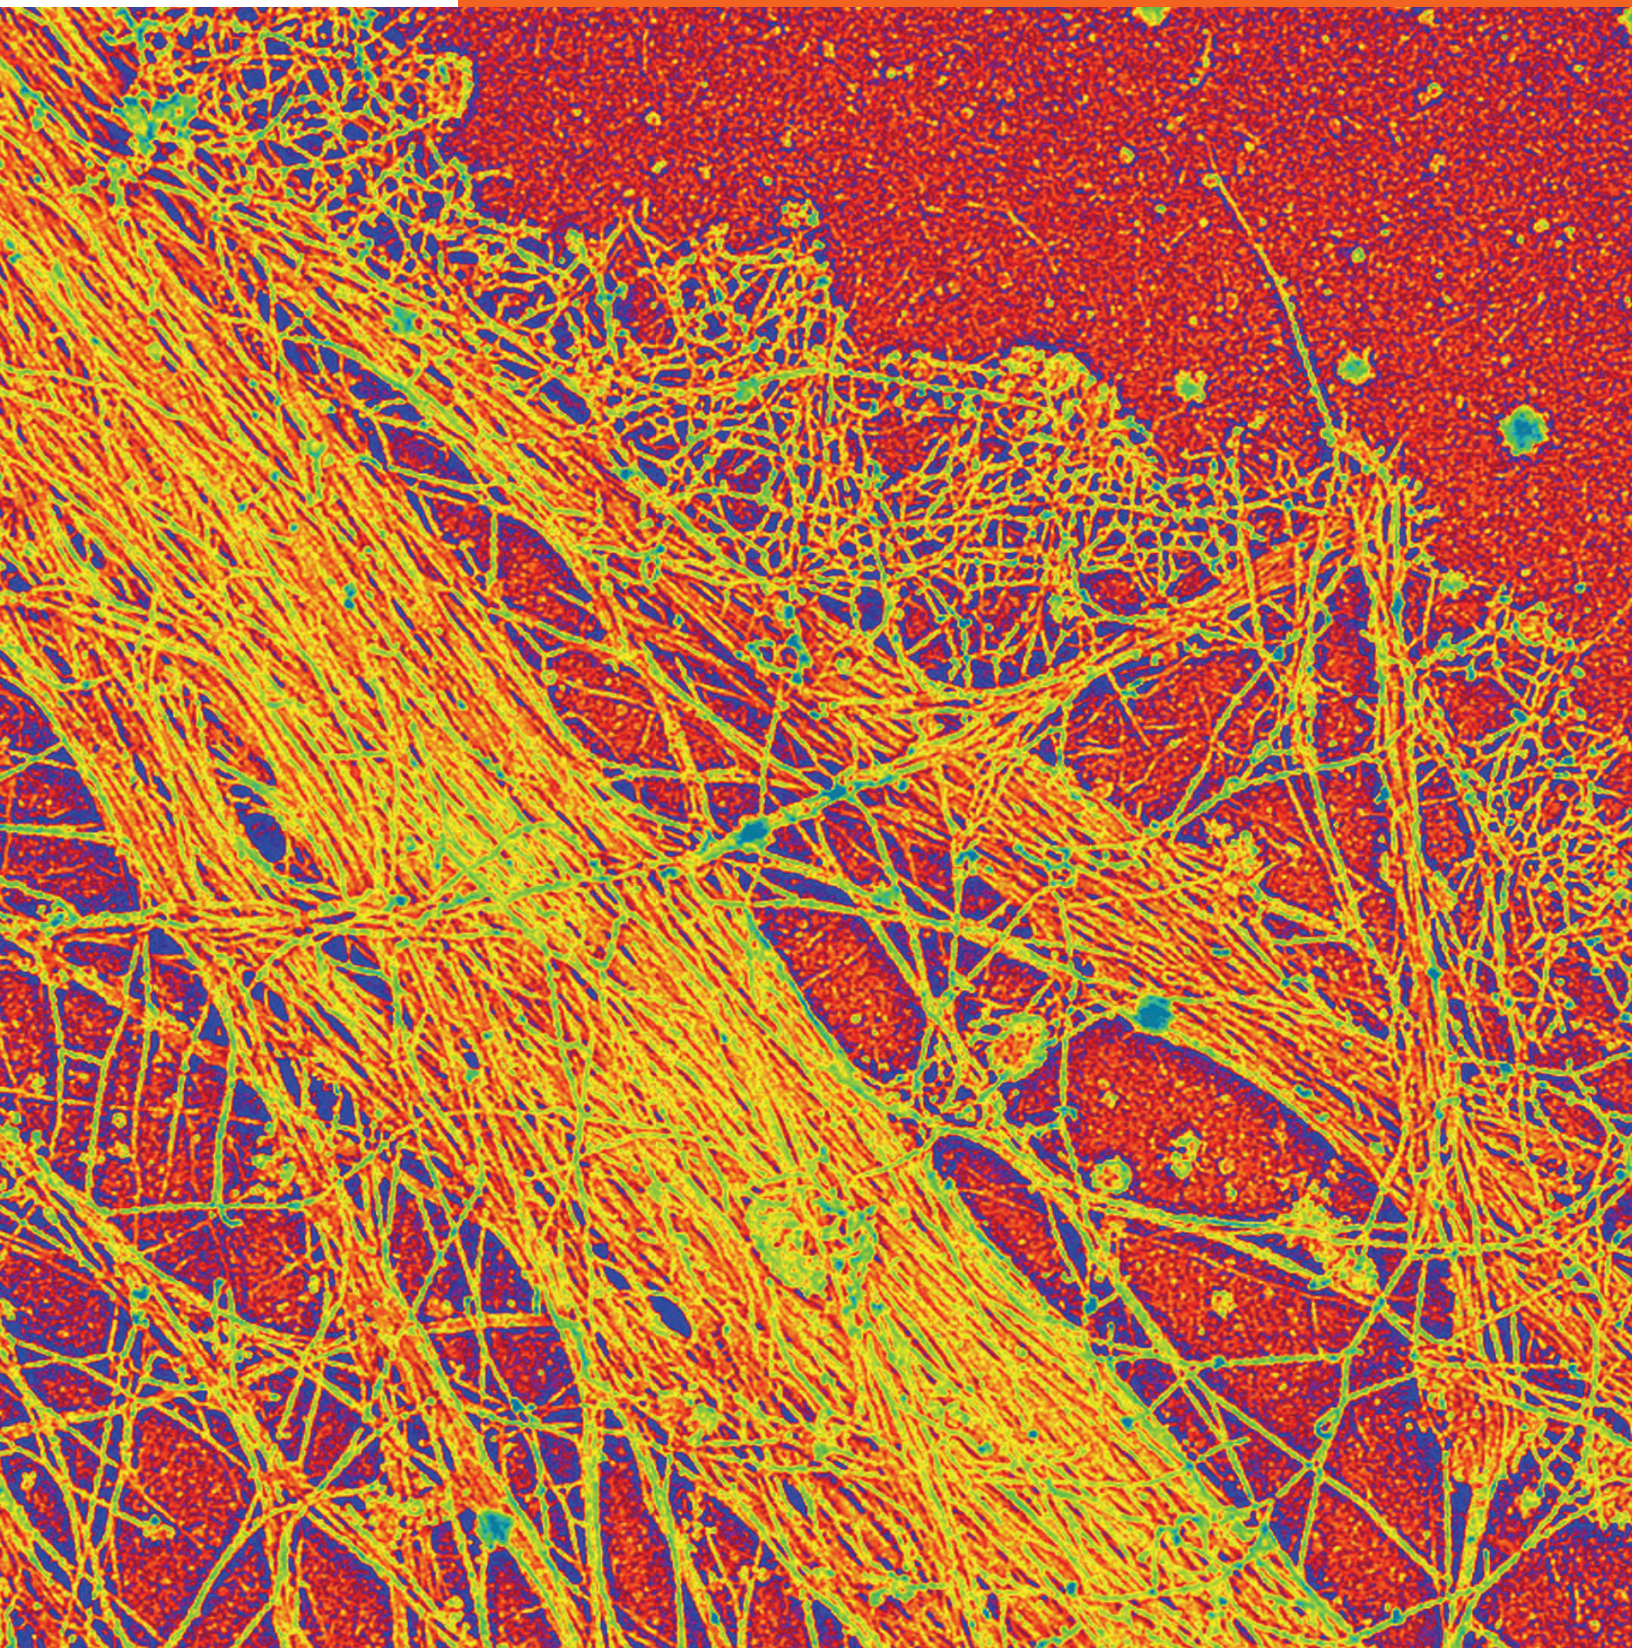

Source: http://www.lifescied.org/doi/suppl/10.1187/lse.2016.15.issue-2/suppl_file/front.pdf
